# Supplementary material
Source: PubMed Central journal article supplement (PMC8854350)

**Figure S2**

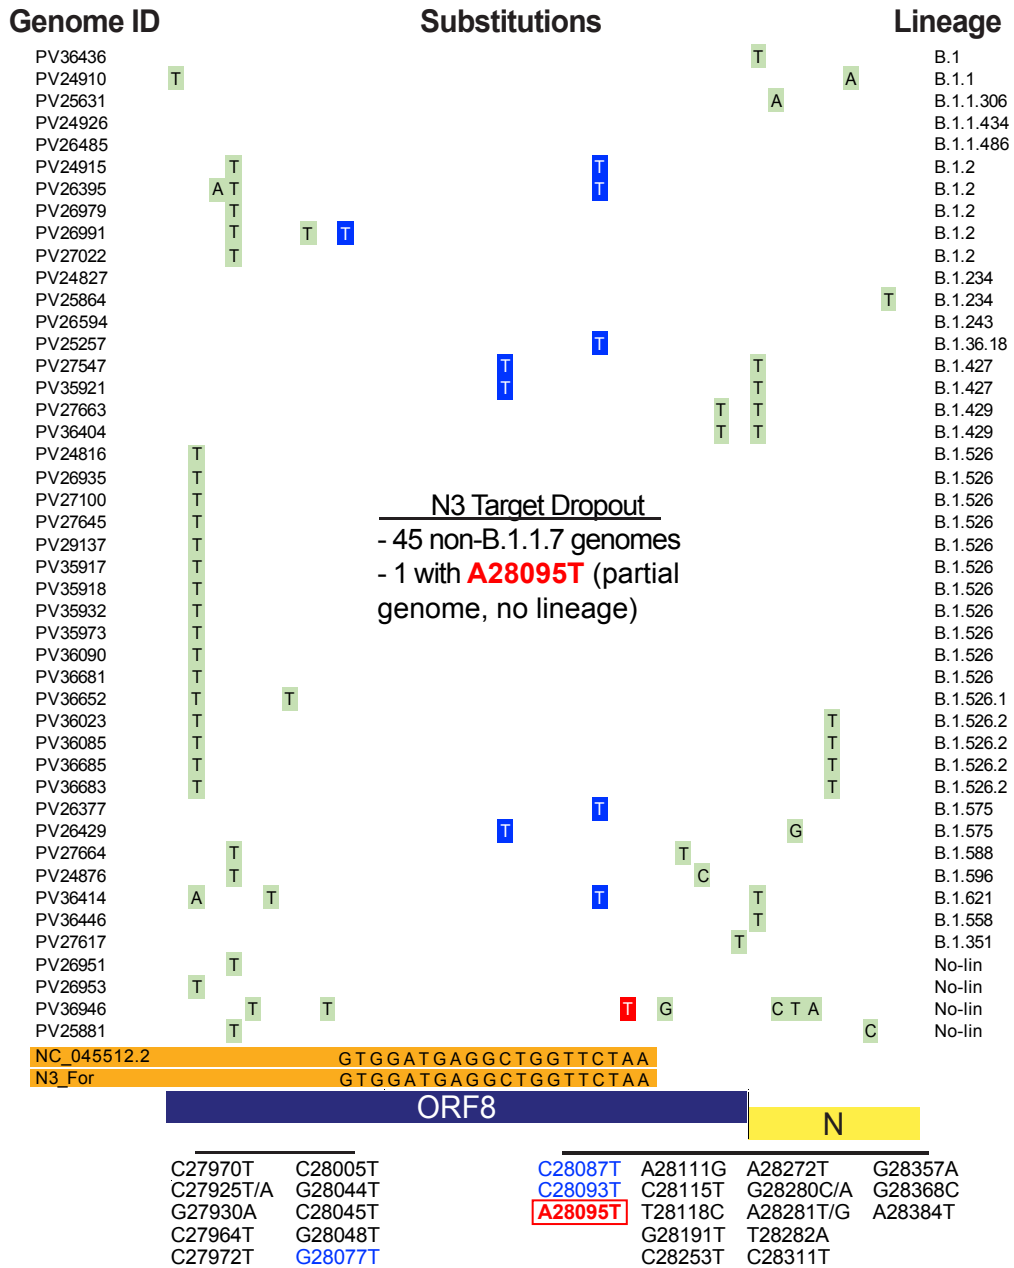

Supplement: NIHMS1763145-supplement-fS2.pdf [file NIHMS1763145-supplement-fS2.pdf]
